# Supplementary material for: Electrically Triggered Drug Delivery from Novel Electrospun Poly(Lactic Acid)/Graphene Oxide/Quercetin Fibrous Scaffolds for Wound Dressing Applications
Source: MDPI journal article supplement (doi:10.3390/pharmaceutics13070957), 2021-06-25
Supplement: s1 [file s1]

# Supplementary Materials: Electrically Triggered Drug Delivery from Novel Electrospun Poly(lactic acid)/Graphene Oxide/Quercetin Fibrous Scaffolds for Wound Dressing Applications

Alexa-Maria Croitoru, Yasin Karaçelebi, Elif Saatcioglu, Eray Altan, Songul Ulag, Huseyin Kivanc Aydoğan, Ali Sahin, Ludmila Motelica, Ovidiu Oprea, Bianca-Maria Tihauan, Roxana-Cristina Popescu, Diana Savu, Roxana Trusca, Denisa Ficai, Oguzhan Gunduz and Anton Ficai

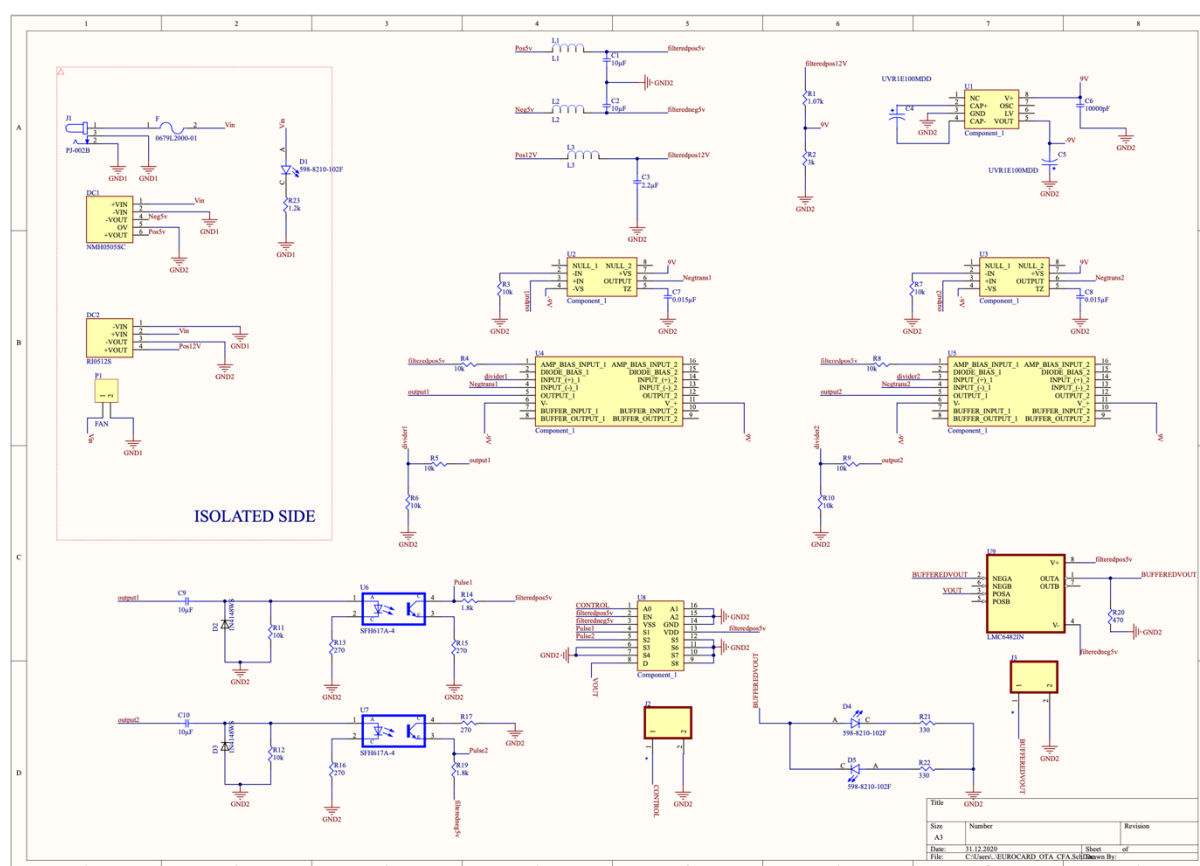

Figure S1. The circuit diagram.

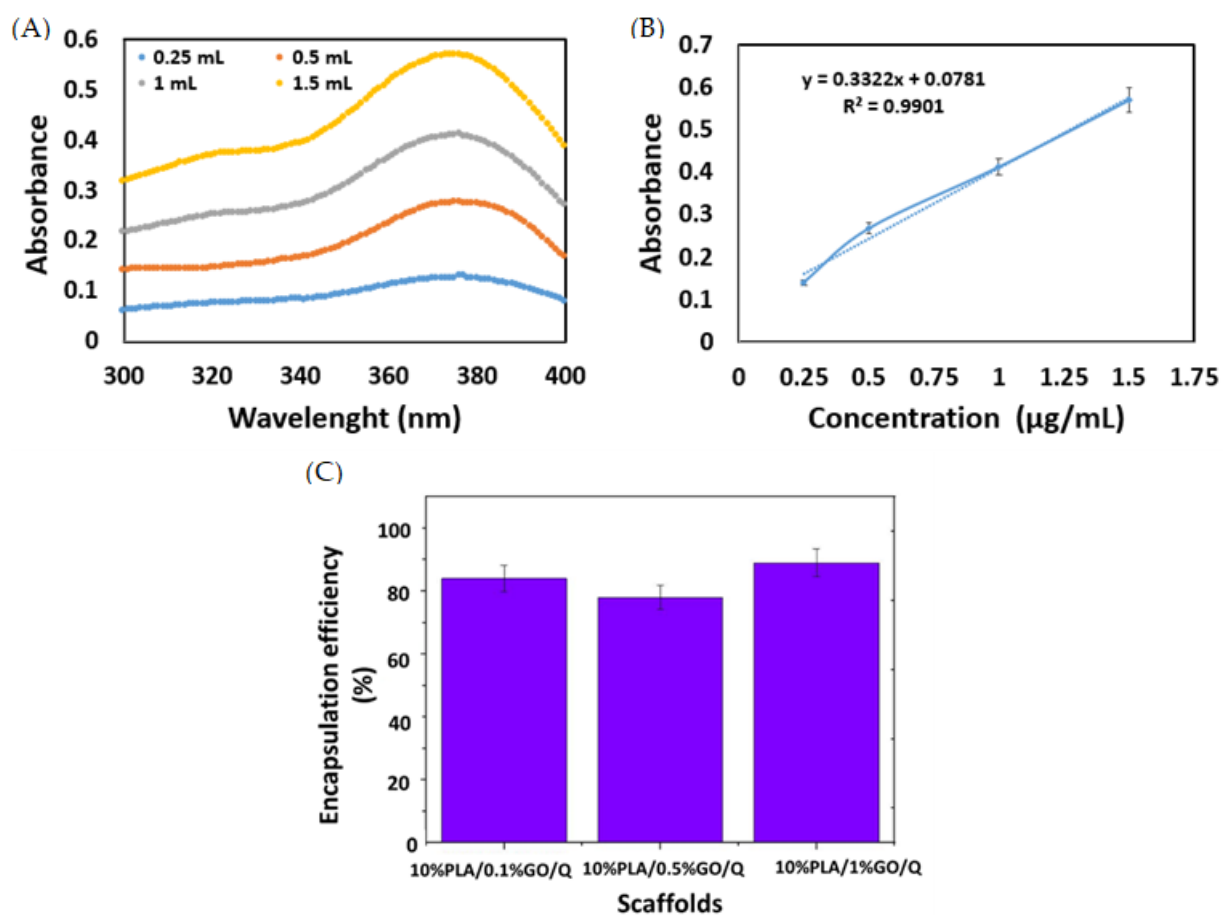

**Figure S2.** The calibration curve of the Q with different amounts (A): 0.25  $\mu\text{g/mL}$ , 0.5  $\mu\text{g/mL}$ , 1  $\mu\text{g/mL}$  and 1.5  $\mu\text{g/mL}$ , absorbance graph obtained at 376 nm (B), encapsulation efficiency of the scaffolds (C).
